# Supplementary material
Source: PubMed Central journal article supplement (PMC4151189)
Supplement: NIHMS615496-supplement-1.pdf [file NIHMS615496-supplement-1.pdf]

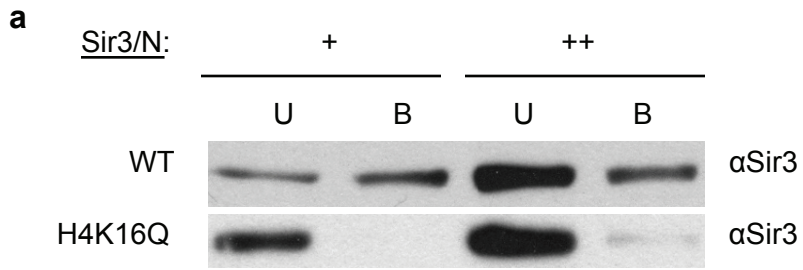

**Supplementary Figure 1. Sir3 specifically binds to WT over H4-K16Q arrays in phosphate buffer containing ~40 mM Na<sup>+</sup>. (a)** Nucleosomal array capture assay as in **Fig. 1a-b** showing a titration of Sir3 on WT and H4-K16Q arrays in 20 mM phosphate buffer.

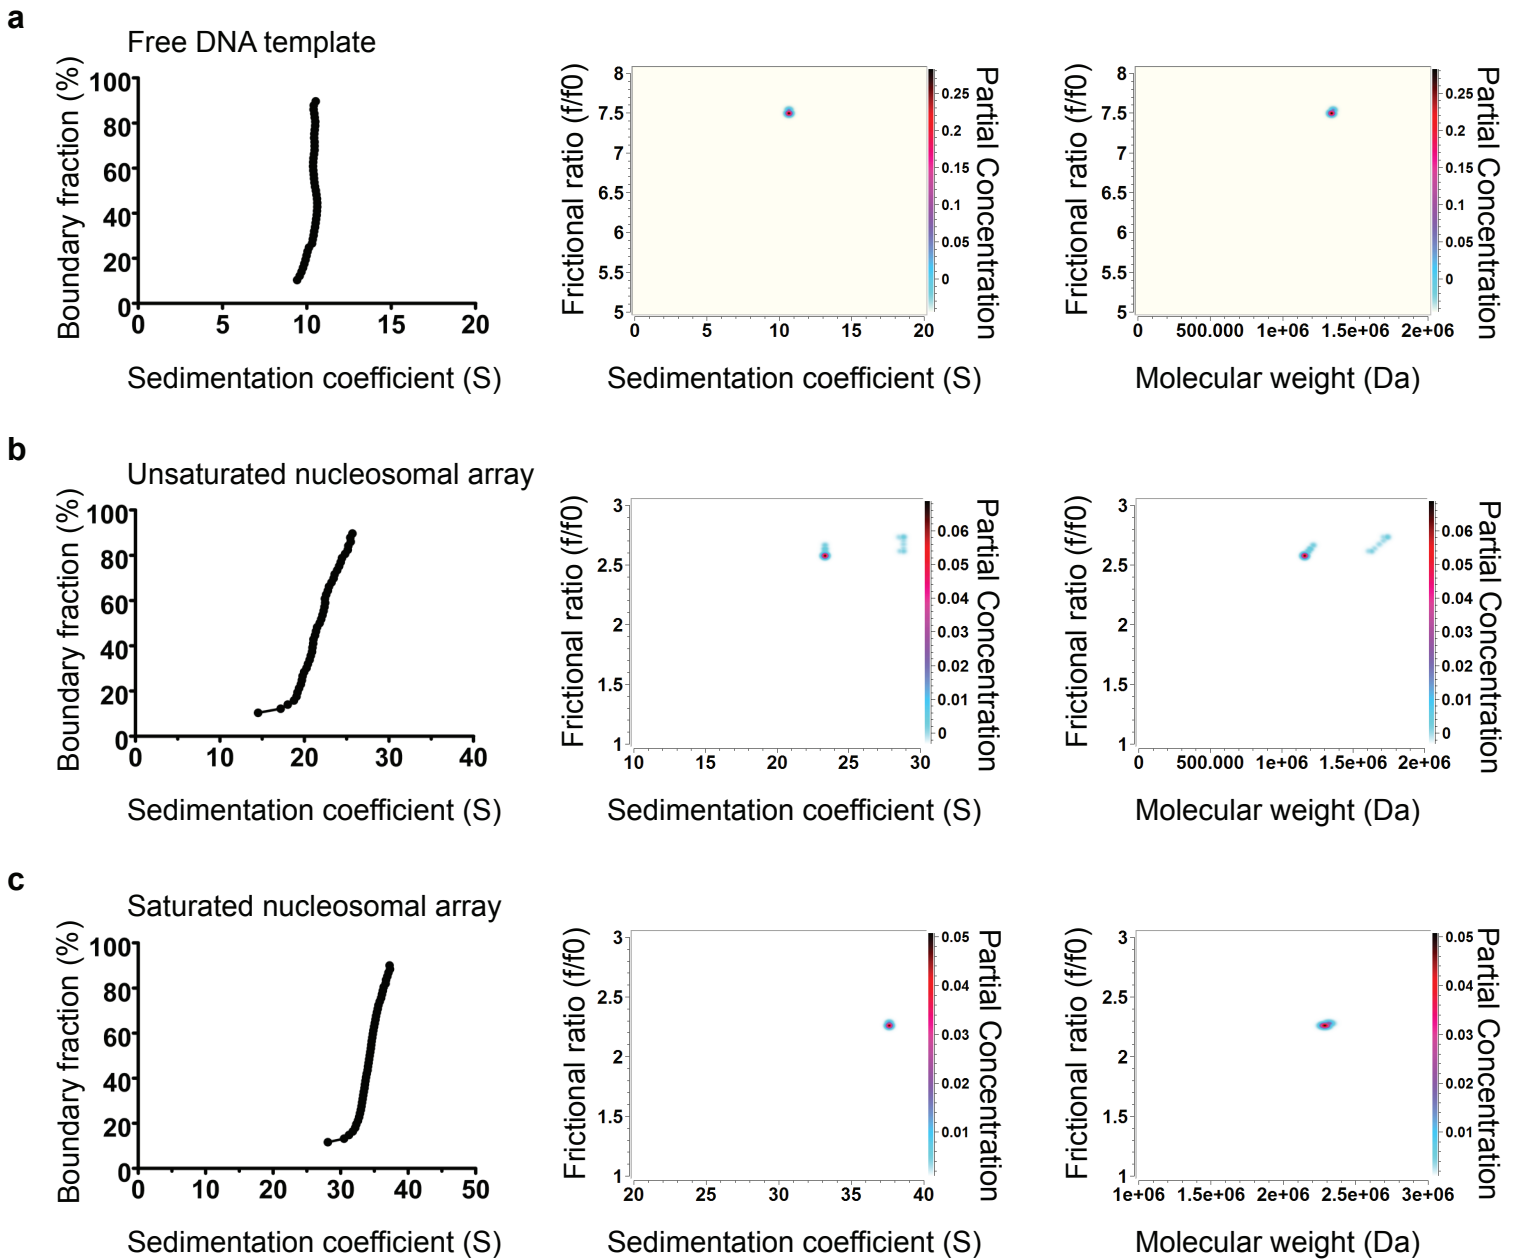

**d**

|                   | Mol. Weight (MDa)            | Sed. Coefficient ( $s^{-13}$ ) | Frictional Ratio     |
|-------------------|------------------------------|--------------------------------|----------------------|
| DNA template      | 1.335 [1.313] (1.333, 1.347) | 10.654 (10.648, 10.668)        | 7.499 (7.486, 7.540) |
| Unsaturated array | 1.167 [1.964] (1.140, 1.195) | 23.341 (23.324, 23.358)        | 2.587 (2.546, 2.627) |
| Saturated array   | 2.296 [2.614] (2.272, 2.321) | 37.594 (37.561, 37.627)        | 2.269 (2.252, 2.285) |

**Supplementary Figure 2. 2DSA/GA-MC modeling using predicted partial specific volumes does not accurately determine the molecular weights of complex chromatin macromolecules. (a-c)** vHW and 2DSA/GA-MC plots of free 601-177-12 template DNA, an approximately half-saturated 12mer nucleosomal array, and a saturated 12mer nucleosomal array, respectively. **(d)** The molecular weight, sedimentation coefficient, and frictional ratio of samples in **(a-c)** as determined by 2DSA/GA-MC. Numbers in parentheses are 95% confidence intervals. Numbers in brackets represent theoretical molecular weights calculated by a sequence-based algorithm implemented in UltraScan3.

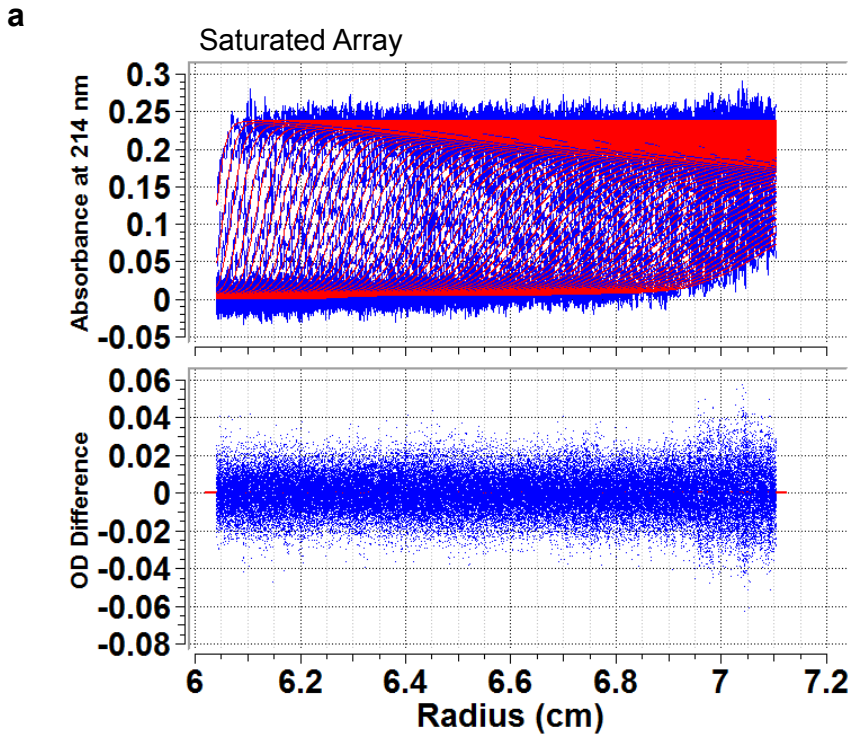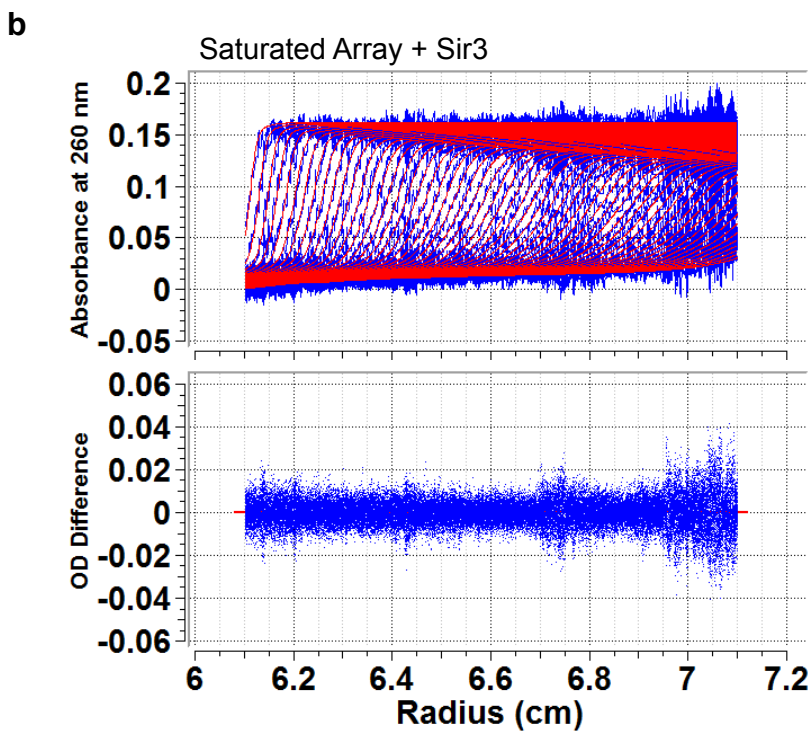

**Supplementary Figure 3. 2DSA fitting is appropriate for chromatin samples. (a-b)** 2DSA experimental vs. model scans (top, model is in red) and residuals (bottom) demonstrate good fits and random residuals for a WT array unbound **(a)** and bound by Sir3 **(b)**.

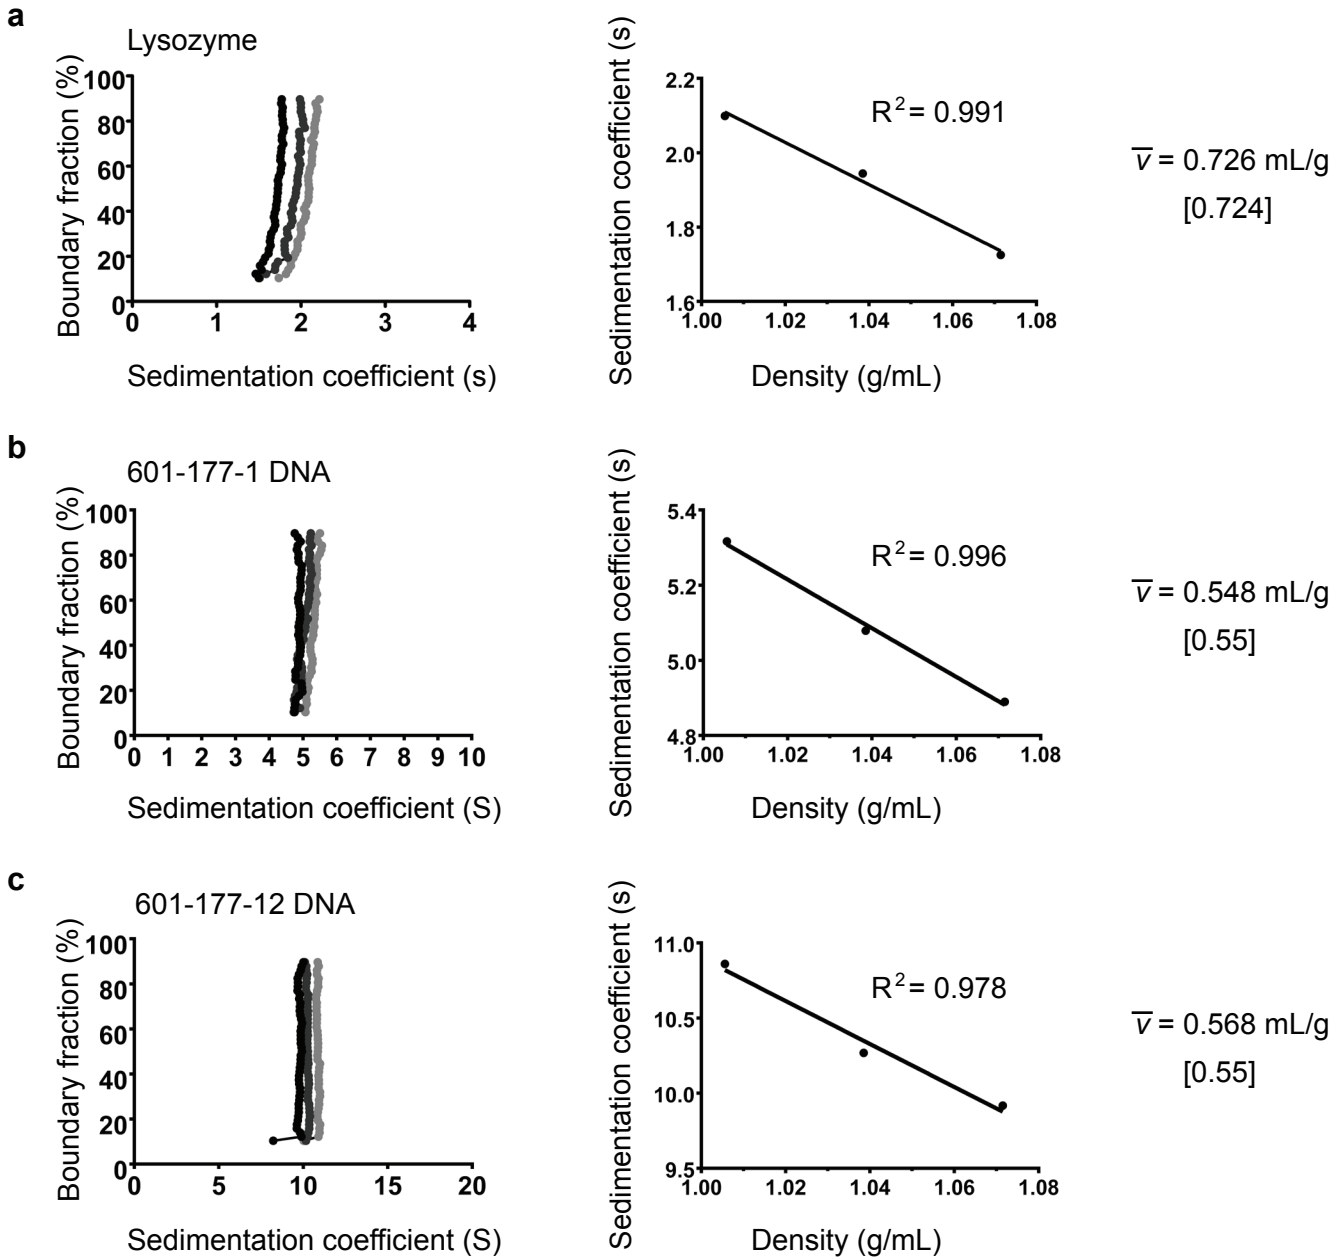

**Supplementary Figure 4. The partial specific volume of molecules can be determined via sedimentation in solvents of known density.** (a-c) vHW plots showing the sedimentation of molecules in 0% (light gray), 30% (dark gray), and 60% H<sub>2</sub>O<sup>18</sup> (black) and plots of sedimentation coefficient vs. density for (a) lysozyme, (b) 601-177-1 template DNA, and (c) 601-177-12 template DNA. The  $\bar{v}$  is calculated by dividing the slope of the fit line by the y-intercept. Numbers in brackets represent the  $\bar{v}$  of the respective molecule as predicted by UltraScan3.

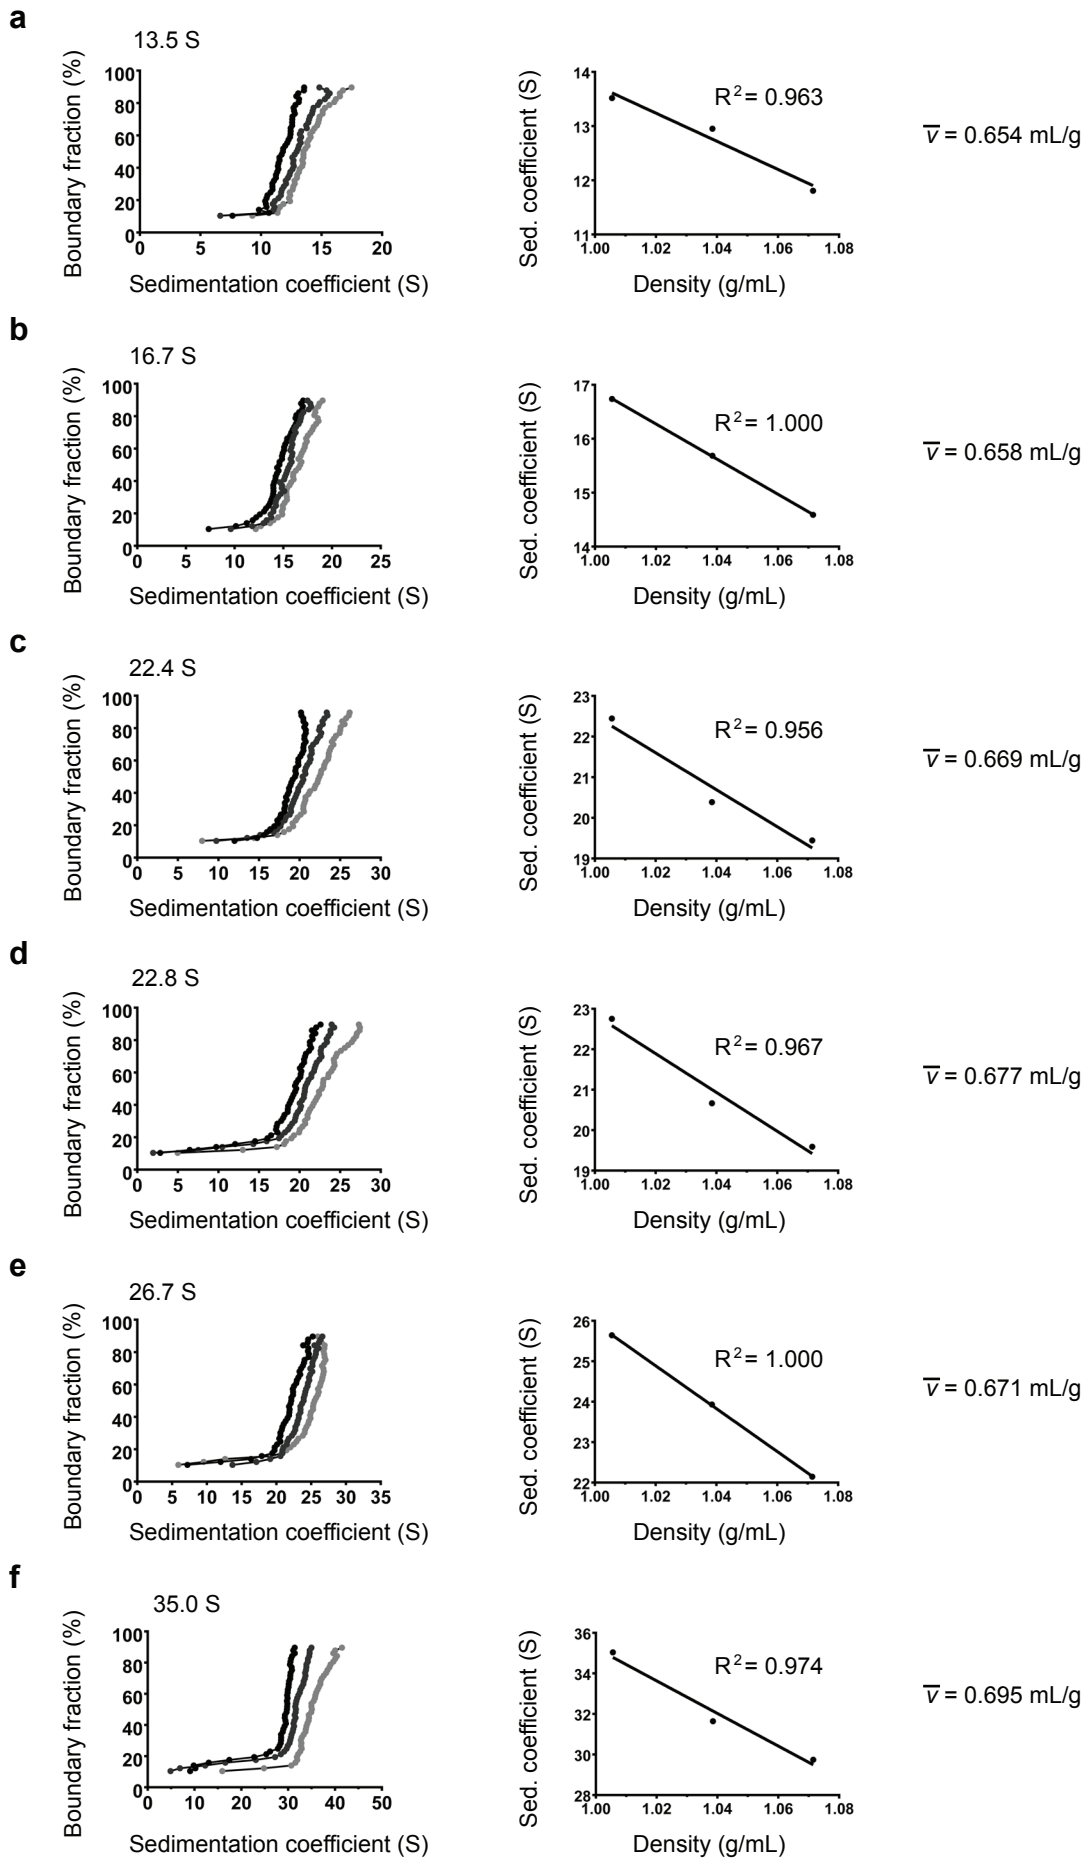

**Supplementary Figure 5. The partial specific volume of nucleosomal arrays increases with histone octamer saturation and S. (a-f) Determination of the  $\bar{v}$  of arrays in Fig. 2 as in Supplementary Fig. 4.**

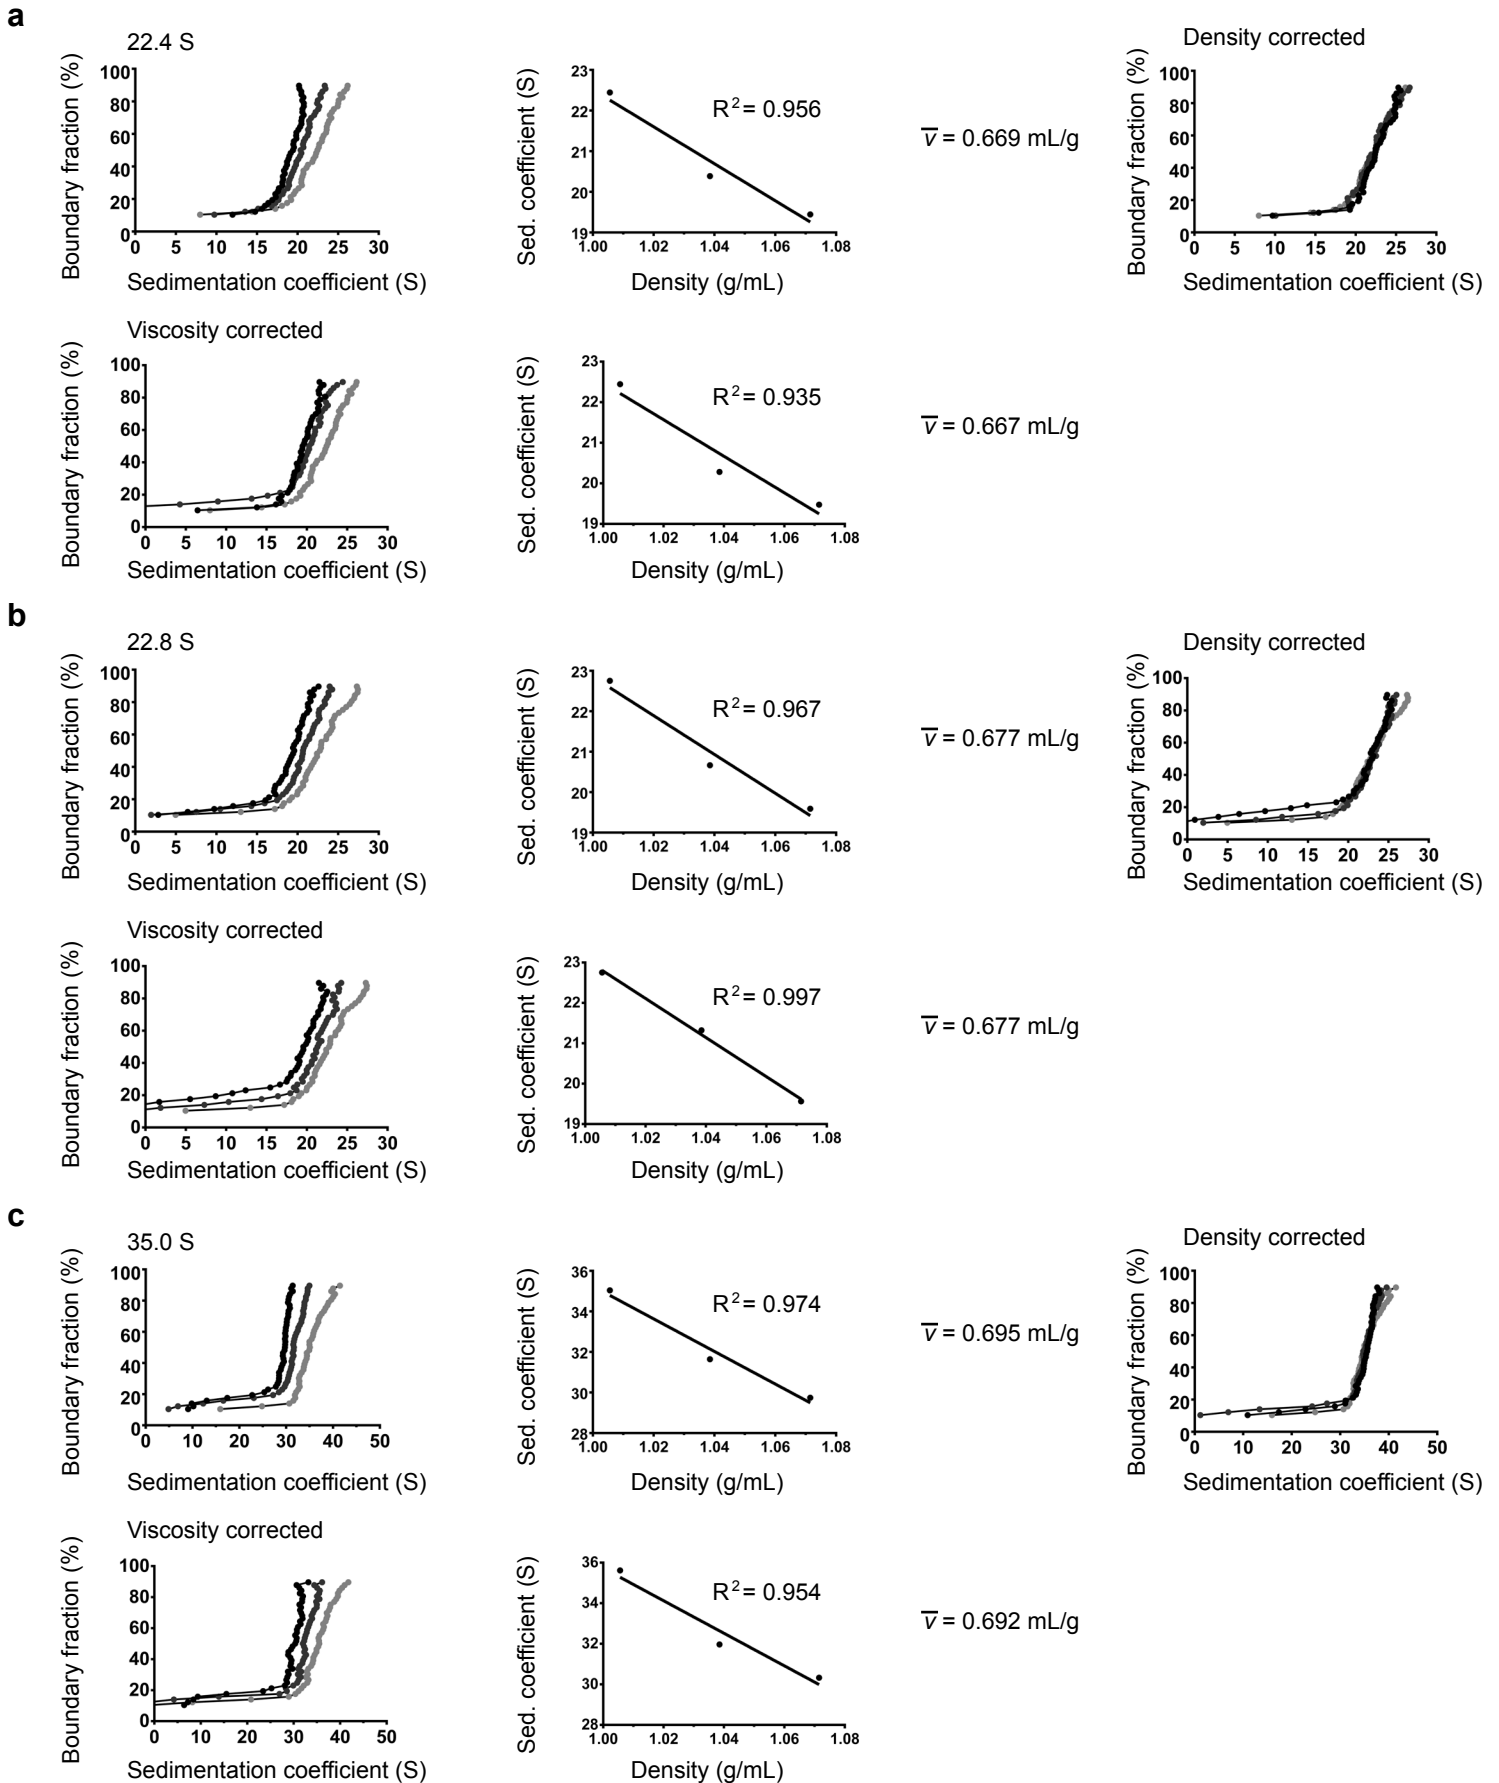

**Supplementary Figure 6. The partial specific volume of nucleosomal arrays is independent of viscosity, and the sedimentation distribution of chromatin samples is highly reproducible. (a-c) The  $\bar{v}$  determination of array samples in Supplementary Fig. 5c,d,f shown as used in Fig. 2 (top panels) and corrected for viscosity (bottom panels). The vHW distributions corrected for density are in the top right panels.**

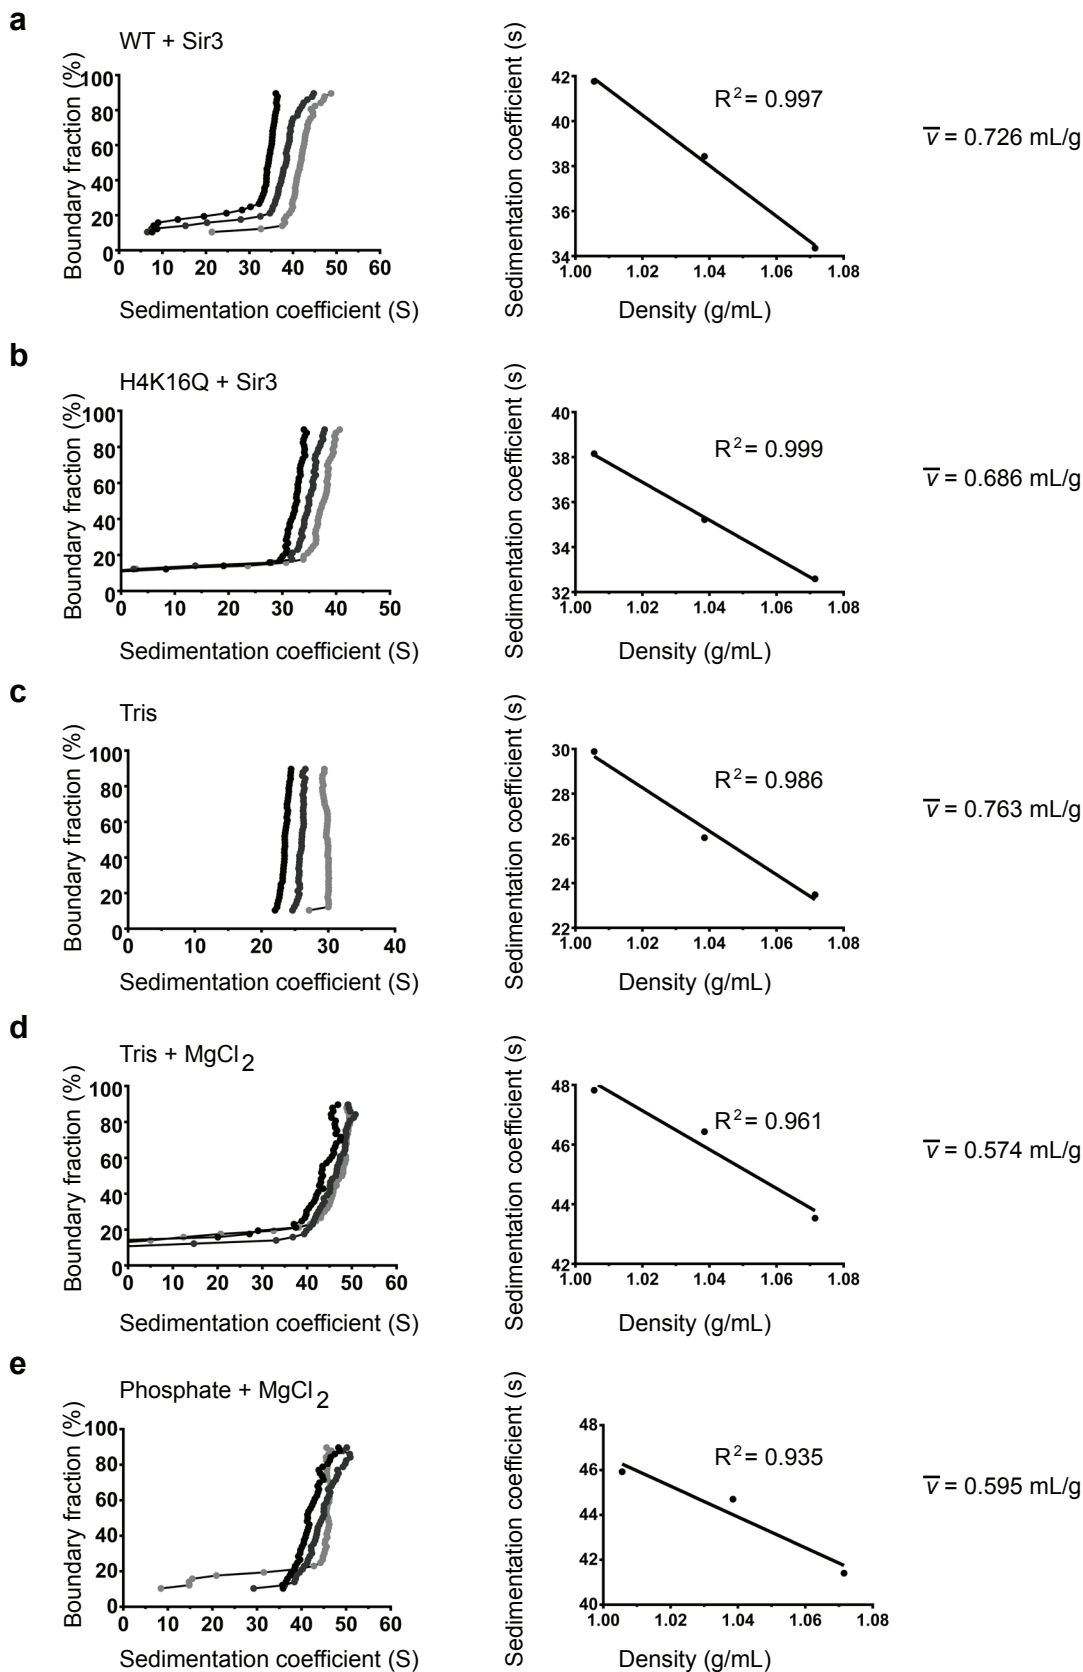

**Supplementary Figure 7. The partial specific volume of arrays decreases during Mg<sup>++</sup>-induced folding but increases upon Sir3 binding. (a-b) Example  $\bar{v}$  determinations of WT and H4K16Q arrays with Sir3. Average  $\bar{v}$ 's from three experiments were used for 2DSA/GA-MC in **Fig. 3**. (c-d) Example  $\bar{v}$  determinations of extended and folded arrays in Tris. Average  $\bar{v}$ 's from three experiments were used for 2DSA/GA-MC in **Fig. 4**. (e) Example  $\bar{v}$  determinations of folded arrays in phosphate buffer.**

**a**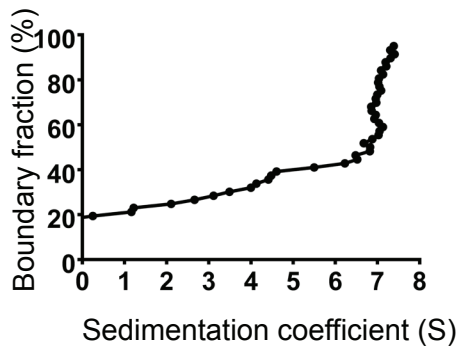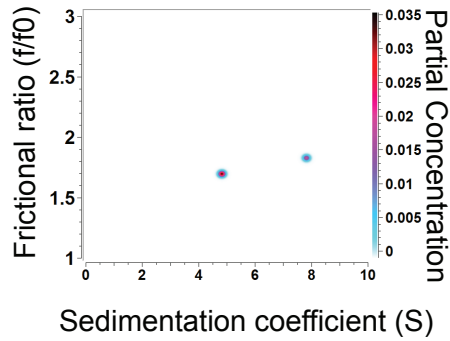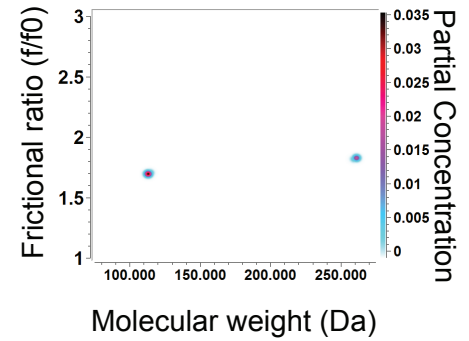**b**

|         | Relative Percent | Sed. Coefficient (S) | Mol. Weight (kDa)       | Frictional Ratio     |
|---------|------------------|----------------------|-------------------------|----------------------|
| Monomer | 68.97 %          | 4.824 (4.815, 4.832) | 113.43 (112.48, 114.38) | 1.701 (1.693, 1.708) |
| Dimer   | 31.03 %          | 7.819 (7.806, 7.832) | 260.53 (258.73, 262.33) | 1.826 (1.819, 1.834) |

**Supplementary Figure 8. Sir3 exists as a mixture of monomers and dimers in solution.** (a) Left panel, vHW analysis of Sir3 at 171 nM (corresponding to the concentration used for 2 monomers of Sir3 per nucleosome in **Fig. 1d-e** and **3**) in phosphate buffer. Middle and right panels, GA-MC plots of S vs. molecular weight and  $f/f_0$  vs. molecular weight. (b) 2DSA/GA-MC statistics show 69% of Sir3 in solution is a monomer (113 kDa), and 31% exists as an oligomer with a molecular weight most closely corresponding to a dimer (theoretical molecular weight is 226 kDa).



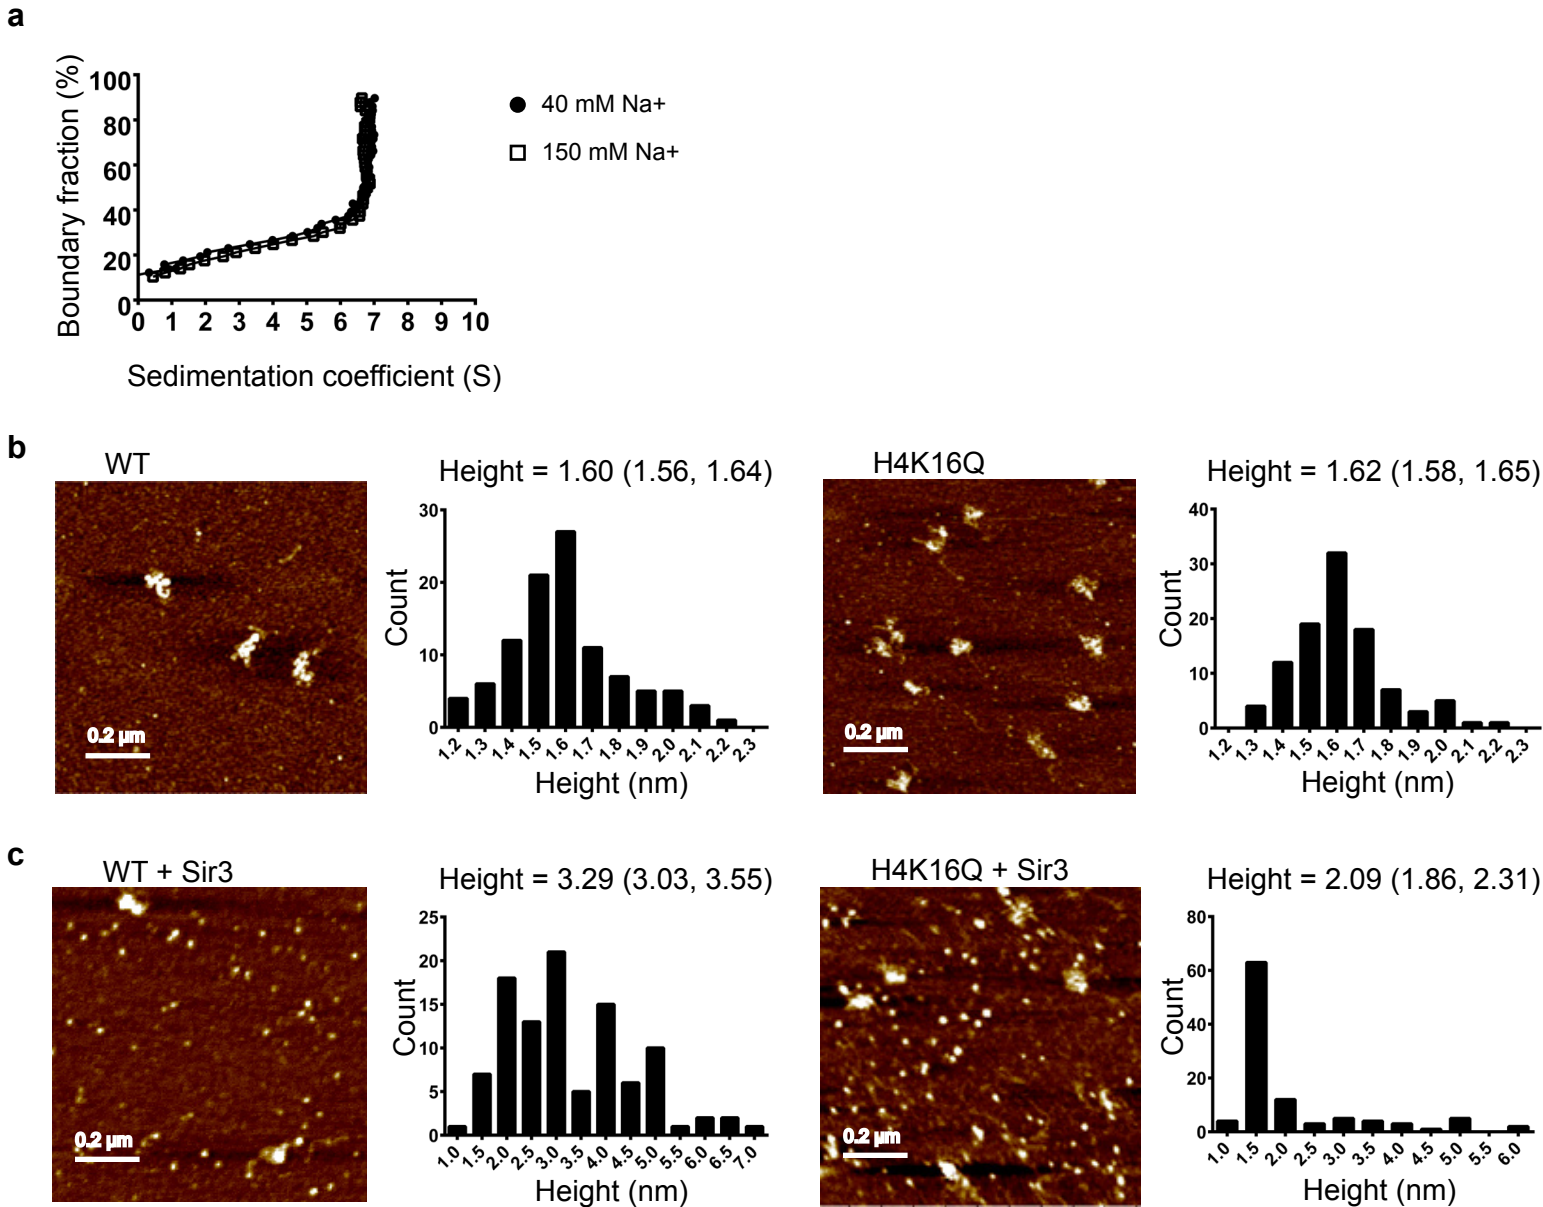

**Supplementary Figure 9. Sir3-array structure in 150 mM Na<sup>+</sup> closely resembles Sir3-array structure in 40 mM Na<sup>+</sup>.** (a) vHW analysis of 171 nM Sir3 in phosphate buffer containing ~40 mM Na<sup>+</sup> or in phosphate buffer brought to 150 mM Na<sup>+</sup>. (b) WT and H4-K16Q arrays in phosphate buffer brought to 150 mM Na<sup>+</sup> are equivalent in structure and height to arrays in phosphate buffer alone (compare to Fig. 5b). (c) WT and H4-K16Q arrays in phosphate buffer brought to 150 mM Na<sup>+</sup> are similar in structure and height to arrays in phosphate buffer alone in the presence of 2 Sir3 monomers/nucleosome (compare to Fig. 5c).

**a**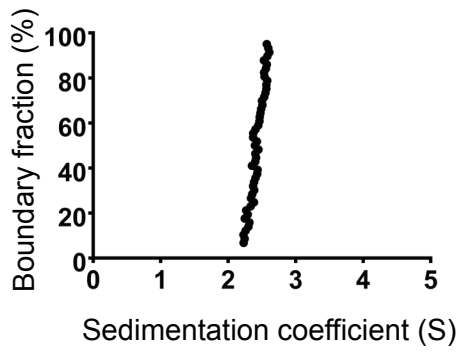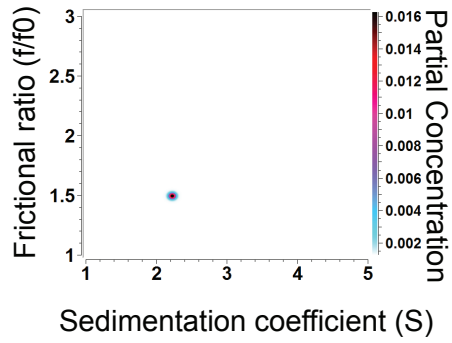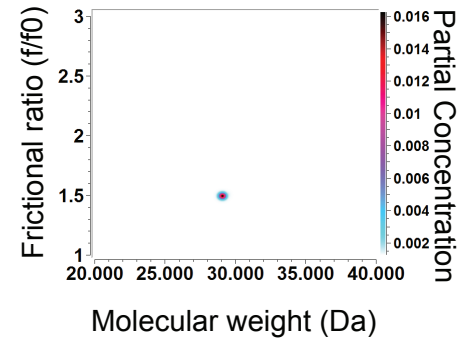**b**

|         | Sed. Coefficient (S) | Mol. Weight (kDa)                | Frictional Ratio     |
|---------|----------------------|----------------------------------|----------------------|
| Monomer | 2.224 (2.222, 2.226) | 29.119 [26.336] (28.965, 29.274) | 1.498 (1.492, 1.503) |

**Supplementary Figure 10. Sir3 BAH exists as a monomer in solution.** (a) Left panel, vHW analysis Sir3 BAH at 1.71  $\mu\text{M}$  in phosphate buffer. Middle and right panels, GA-MC plots of S vs. molecular weight and  $f/f_0$  vs. molecular weight. (b) 2DSA/GA-MC statistics show 100% of Sir3 BAH in solution is a monomer. Number in brackets is the expected molecular weight.
